# Supplementary material
Source: publisher figshare collection journal article supplement (https://gsajournals.figshare.com/ndownloader/files/25472723)
Supplement: Supplementary file 1 [file 25472723]

## Sheet: S2_Table
	Supplementary Table 2: Statistical Analyses of Exercise Endurance of MyBPC3 transgenic flies. Standard least squares and Tukey test analyses were performed in JMP® Pro, Version 14 (SAS Institute Inc., Cary, NC, 1989-2019) using the full model: Y = µ + G + S + T + G*S + G*T + S*T + G*S*T + Rep(G*S*T) + ε, and the reduced model (by sex): Y = µ + G + T + G*T + Rep(G*T) + ε, where G, S, T, Rep and ε …
ANOVA Full Model	Source	DF	Sum of Squares	F Ratio	Prob > F
	Genotype	3	657.107	93.7879	<.0001
	Sex	1	112.336	48.1008	<.0001
	Treatment	1	3443.1	1474.28	<.0001
	G*S	3	122.568	17.4939	<.0001
	G*T	3	408.612	58.3206	<.0001
	S*T	1	317.96	136.146	<.0001
	G*S*T	3	107.093	15.2852	<.0001
	Rep(G*S*T)	32	855.848	11.4519	<.0001
ANOVA Females	Source	Nparm	DF	Sum of Squares	F Ratio	Prob > F
	Genotype	3	3	486.848	64.0297	<.0001
	Treatment	1	1	821.613	324.173	<.0001
	Genotype*Treatment	3	3	82.2778	10.8211	<.0001
	Rep[Genotype*Treatment]	16	16	472.184	11.644	<.0001
ANOVA Males	Source	Nparm	DF	Sum of Squares	F Ratio	Prob > F
	Genotype	3	3	295.33	45.9441	<.0001
	Treatment	1	1	2972.44	1387.26	<.0001
	Genotype*Treatment	3	3	426.344	66.3259	<.0001
	Rep[Genotype*Treatment]	16	16	383.664	11.1911	<.0001
Tukey HSD (Full Model)	Genotype	Sex	Condition	Tukey Groupings	Least Sq Mean	Std Error
	Attp2 (control)	F	PRE_Exercise	A	6.33069	0.1313
	WT-MyBPC3	F	PRE_Exercise	BC	5.48894	0.13458
	A31P-MyBPC3	F	PRE_Exercise	C	5.25163	0.13279
	R820W-MyBPC3	F	PRE_Exercise	BC	5.42063	0.13987
	Attp2 (control)	F	POST_Exercise	C	5.35714	0.1295
	WT-MyBPC3	F	POST_Exercise	D	3.81871	0.13851
	A31P-MyBPC3	F	POST_Exercise	E	3.03692	0.15235
	R820W-MyBPC3	F	POST_Exercise	E	2.97745	0.14082
	Attp2 (control)	M	PRE_Exercise	BC	5.59637	0.13383
	WT-MyBPC3	M	PRE_Exercise	AB	5.9863	0.12792
	A31P-MyBPC3	M	PRE_Exercise	A	6.59117	0.13023
	R820W-MyBPC3	M	PRE_Exercise	BC	5.61095	0.13092
	Attp2 (control)	M	POST_Exercise	D	4.3915	0.13648
	WT-MyBPC3	M	POST_Exercise	G	1.58542	0.14358
	A31P-MyBPC3	M	POST_Exercise	EF	2.40558	0.13592
	R820W-MyBPC3	M	POST_Exercise	FG	1.72555	0.1445
Tukey HSD (Females)	Genotype	Condition	Tukey Groupings	Least Sq Mean	Std Error
	Attp2 (control)	PRE_Exercise	A	6.33069	0.13679
	WT-MyBPC3	PRE_Exercise	B	5.48894	0.14019
	A31P-MyBPC3	PRE_Exercise	B	5.25163	0.13833
	R820W-MyBPC3	PRE_Exercise	B	5.42063	0.14571
	Attp2 (control)	POST_Exercise	B	5.35714	0.1349
	WT-MyBPC3	POST_Exercise	C	3.81871	0.14429
	A31P-MyBPC3	POST_Exercise	D	3.03692	0.15871
	R820W-MyBPC3	POST_Exercise	D	2.97745	0.1467
Tukey HSD (Males)	Genotype	Condition	Tukey Groupings	Least Sq Mean	Std Error
	Attp2 (control)	PRE_Exercise	B	5.59637	0.12819
	WT-MyBPC3	PRE_Exercise	B	5.9863	0.12252
	A31P-MyBPC3	PRE_Exercise	A	6.59117	0.12474
	R820W-MyBPC3	PRE_Exercise	B	5.61095	0.1254
	Attp2 (control)	POST_Exercise	C	4.3915	0.13073
	WT-MyBPC3	POST_Exercise	E	1.58542	0.13753
	A31P-MyBPC3	POST_Exercise	D	2.40558	0.13019
	R820W-MyBPC3	POST_Exercise	E	1.72555	0.13841
